# Supplementary material for: Fluoroethylnormemantine, A Novel Derivative of Memantine, Facilitates Extinction Learning Without Sensorimotor Deficits
Source: PubMed Central journal article supplement — Int J Neuropsychopharmacol. 2021 Feb 25;24(6):519–31. doi: 10.1093/ijnp/pyab007 (PMC8278800; doi:10.1093/ijnp/pyab007), 2021-02-25
Supplement: pyab007_suppl_supplementary_materials_s2.pdf [file pyab007_suppl_supplementary_materials_s2.pdf]

**Table S01: Statistical analysis**

| Cohort                              | Behavioral Paradigm | Abbrev | Measurement             | Statistical Test               | Comparison                          | F      | ° of freedom | p       | *   | Fig. |
|-------------------------------------|---------------------|--------|-------------------------|--------------------------------|-------------------------------------|--------|--------------|---------|-----|------|
| Baseline, PPI                       | Prepulse Inhibition | PPI    | Prepulse intensity (dB) | RMANOVA                        | Drug                                | 2.94   | 4,55         | 0.0283  | *   | 1B   |
|                                     |                     |        |                         |                                | Pulses                              | 68.35  | 3,165        | <0.0001 | *** |      |
|                                     |                     |        |                         |                                | Drug x Pulses                       | 0.5241 | 12,165       | 0.8970  | -   |      |
|                                     |                     |        |                         | Dunnett's multiple comparisons | Saline vs. Memantine (10 mg/kg)     | -      | -            | 0.0103  | *   |      |
|                                     |                     |        |                         |                                | Saline vs. FENM (5 mg/kg)           | -      | -            | 0.4591  | -   |      |
|                                     |                     |        |                         |                                | Saline vs. FENM (10 mg/kg)          | -      | -            | 0.7847  | -   |      |
|                                     |                     |        |                         | Dunnett's multiple comparisons | Saline vs. FENM (20 mg/kg)          | -      | -            | 0.9824  | -   |      |
|                                     |                     |        |                         |                                | 72: Saline vs. Memantine (10 mg/kg) | -      | -            | 0.0671  | -   |      |
|                                     |                     |        |                         |                                | 72: Saline vs. FENM (5 mg/kg)       | -      | -            | 0.2305  | -   |      |
|                                     |                     |        |                         |                                | 72: Saline vs. FENM (10 mg/kg)      | -      | -            | 0.4287  | -   |      |
|                                     |                     |        |                         |                                | 72: Saline vs. FENM (20 mg/kg)      | -      | -            | 0.7808  | -   |      |
|                                     |                     |        |                         |                                | 76: Saline vs. Memantine (10 mg/kg) | -      | -            | 0.0231  | *   |      |
|                                     |                     |        |                         |                                | 76: Saline vs. FENM (5 mg/kg)       | -      | -            | 0.6311  | -   |      |
|                                     |                     |        |                         |                                | 76: Saline vs. FENM (10 mg/kg)      | -      | -            | 0.7963  | -   |      |
|                                     |                     |        |                         |                                | 76: Saline vs. FENM (20 mg/kg)      | -      | -            | 0.9999  | -   |      |
|                                     |                     |        |                         |                                | 80: Saline vs. Memantine (10 mg/kg) | -      | -            | 0.0688  | -   |      |
|                                     |                     |        |                         |                                | 80: Saline vs. FENM (5 mg/kg)       | -      | -            | 0.8233  | -   |      |
|                                     |                     |        |                         |                                | 80: Saline vs. FENM (10 mg/kg)      | -      | -            | 0.9887  | -   |      |
|                                     |                     |        |                         |                                | 80: Saline vs. FENM (20 mg/kg)      | -      | -            | >0.9999 | -   |      |
| 84: Saline vs. Memantine (10 mg/kg) | -                   | -      | 0.0190                  | *                              |                                     |        |              |         |     |      |
| 84: Saline vs. FENM (5 mg/kg)       | -                   | -      | 0.8583                  | -                              |                                     |        |              |         |     |      |

|                            |            |    |                              |                                |                                 |        |      |         |     |    |
|----------------------------|------------|----|------------------------------|--------------------------------|---------------------------------|--------|------|---------|-----|----|
|                            |            |    |                              |                                | 84: Saline vs. FENM (10 mg/kg)  | -      | -    | 0.9961  | -   |    |
|                            |            |    |                              |                                | 84: Saline vs. FENM (20 mg/kg)  | -      | -    | 0.9658  | -   |    |
|                            |            |    | Mean prepulse intensity (dB) | ANOVA                          | Drug                            | 2.94   | 4,55 | 0.0283  | *   | 1C |
|                            |            |    |                              | Dunnett's multiple comparisons | Saline vs. Memantine (10 mg/kg) | -      | -    | 0.0103  | *   |    |
|                            |            |    |                              |                                | Saline vs. FENM (5 mg/kg)       | -      | -    | 0.4591  | -   |    |
|                            |            |    |                              |                                | Saline vs. FENM (10 mg/kg)      | -      | -    | 0.7847  | -   |    |
|                            |            |    |                              |                                | Saline vs. FENM (20 mg/kg)      | -      | -    | 0.9824  | -   |    |
| Baseline, avoidance in OF  | Open Field | OF | Ambulatory Counts            | ANOVA                          | Drug                            | 14.190 | 4,55 | <0.0001 | *** | 2B |
|                            |            |    |                              | Dunnett's multiple comparisons | Saline vs. Memantine (10 mg/kg) | -      | -    | <0.0001 | *** |    |
|                            |            |    |                              |                                | Saline vs. FENM (5 mg/kg)       | -      | -    | 0.8133  | -   |    |
|                            |            |    |                              |                                | Saline vs. FENM (10 mg/kg)      | -      | -    | 0.9259  | -   |    |
|                            |            |    |                              |                                | Saline vs. FENM (20 mg/kg)      | -      | -    | 0.0939  | -   |    |
|                            |            |    | Vertical Counts              | ANOVA                          | Drug                            | 14.430 | 4,55 | <0.0001 | *** | 2C |
|                            |            |    |                              | Dunnett's multiple comparisons | Saline vs. Memantine (10 mg/kg) | -      | -    | <0.0001 | *** |    |
|                            |            |    |                              |                                | Saline vs. FENM (5 mg/kg)       | -      | -    | 0.9720  | -   |    |
|                            |            |    |                              |                                | Saline vs. FENM (10 mg/kg)      | -      | -    | 0.1678  | -   |    |
|                            |            |    |                              |                                | Saline vs. FENM (20 mg/kg)      | -      | -    | 0.9993  | -   |    |
|                            |            |    | Stereotypic Counts           | ANOVA                          | Drug                            | 10.860 | 4,55 | <0.0001 | *** | 2F |
|                            |            |    |                              | Dunnett's multiple comparisons | Saline vs. Memantine (10 mg/kg) | -      | -    | <0.0001 | *** |    |
|                            |            |    |                              |                                | Saline vs. FENM (5 mg/kg)       | -      | -    | 0.9933  | -   |    |
|                            |            |    |                              |                                | Saline vs. FENM (10 mg/kg)      | -      | -    | 0.9500  | -   |    |
| Saline vs. FENM (20 mg/kg) | -          | -  |                              |                                | 0.9998                          | -      |      |         |     |    |
|                            |            |    | Center Time                  | ANOVA                          | Drug                            | 0.449  | 4,55 | 0.4487  | -   | 2E |
|                            |            |    |                              |                                | Drug                            | 3.649  | 6,77 | 0.0031  | **  |    |

|                             |                                |                                 |        |        |         |     |
|-----------------------------|--------------------------------|---------------------------------|--------|--------|---------|-----|
| Immobility Time (sec)       | RMANOVA                        | Time                            | 68.02  | 5,385  | <0.0001 | *** |
|                             |                                | Drug x Time                     | 1.503  | 30,385 | 0.0461  | *   |
|                             | Dunnett's multiple comparisons | Saline vs. Memantine (1 mg/kg)  | -      | -      | 0.0435  | *   |
|                             |                                | Saline vs. Memantine (3 mg/kg)  | -      | -      | 0.1678  | -   |
|                             |                                | Saline vs. Memantine (10 mg/kg) | -      | -      | 0.0007  | **  |
|                             |                                | Saline vs. FENM (1 mg/kg)       | -      | -      | 0.5903  | -   |
|                             |                                | Saline vs. FENM (3 mg/kg)       | -      | -      | 0.9161  | -   |
| Saline vs. FENM (10 mg/kg)  | -                              | -                               | 0.0504 | -      |         |     |
| Immobility Time Min 1 (sec) | Dunnett's multiple comparisons | Saline vs. Memantine (1 mg/kg)  | -      | -      | 0.9944  | -   |
|                             |                                | Saline vs. Memantine (3 mg/kg)  | -      | -      | 0.9995  | -   |
|                             |                                | Saline vs. Memantine (10 mg/kg) | -      | -      | 0.9995  | -   |
|                             |                                | Saline vs. FENM (1 mg/kg)       | -      | -      | 0.9999  | -   |
|                             |                                | Saline vs. FENM (3 mg/kg)       | -      | -      | 0.9998  | -   |
|                             |                                | Saline vs. FENM (10 mg/kg)      | -      | -      | 0.9957  | -   |
| Immobility Time Min 2 (sec) | Dunnett's multiple comparisons | Saline vs. Memantine (1 mg/kg)  | -      | -      | 0.8553  | -   |
|                             |                                | Saline vs. Memantine (3 mg/kg)  | -      | -      | >0.9999 | -   |
|                             |                                | Saline vs. Memantine (10 mg/kg) | -      | -      | 0.0933  | -   |
|                             |                                | Saline vs. FENM (1 mg/kg)       | -      | -      | >0.9999 | -   |
|                             |                                | Saline vs. FENM (3 mg/kg)       | -      | -      | 0.9996  | -   |
|                             |                                | Saline vs. FENM (10 mg/kg)      | -      | -      | 0.971   | -   |
| Immobility Time Min 3 (sec) | Dunnett's multiple comparisons | Saline vs. Memantine (1 mg/kg)  | -      | -      | 0.1354  | -   |
|                             |                                | Saline vs. Memantine (3 mg/kg)  | -      | -      | 0.392   | -   |
|                             |                                | Saline vs. Memantine (10 mg/kg) | -      | -      | 0.0013  | **  |
|                             |                                | Saline vs. FENM (1 mg/kg)       | -      | -      | 0.813   | -   |
|                             |                                | Saline vs. FENM (3 mg/kg)       | -      | -      | 0.9555  | -   |

3B &  
3C

|                                 |                  |     |                                  |                                      |                                 |       |      |        |    |    |
|---------------------------------|------------------|-----|----------------------------------|--------------------------------------|---------------------------------|-------|------|--------|----|----|
| Baseline, FST                   | Forced Swim Test | FST | Immobility Time<br>Min 4 (sec)   | Dunnett's<br>multiple<br>comparisons | Saline vs. FENM (10 mg/kg)      | -     | -    | 0.3854 | -  | 3D |
|                                 |                  |     |                                  |                                      | Saline vs. Memantine (1 mg/kg)  | -     | -    | 0.0127 | *  |    |
|                                 |                  |     |                                  |                                      | Saline vs. Memantine (3 mg/kg)  | -     | -    | 0.0551 | -  |    |
|                                 |                  |     |                                  |                                      | Saline vs. Memantine (10 mg/kg) | -     | -    | 0.0017 | ** |    |
|                                 |                  |     |                                  |                                      | Saline vs. FENM (1 mg/kg)       | -     | -    | 0.2989 | -  |    |
|                                 |                  |     |                                  |                                      | Saline vs. FENM (3 mg/kg)       | -     | -    | 0.0777 | -  |    |
|                                 |                  |     | Immobility Time<br>Min 5 (sec)   | Dunnett's<br>multiple<br>comparisons | Saline vs. FENM (10 mg/kg)      | -     | -    | 0.0062 | ** |    |
|                                 |                  |     |                                  |                                      | Saline vs. Memantine (1 mg/kg)  | -     | -    | 0.0647 | -  |    |
|                                 |                  |     |                                  |                                      | Saline vs. Memantine (3 mg/kg)  | -     | -    | 0.0763 | -  |    |
|                                 |                  |     |                                  |                                      | Saline vs. Memantine (10 mg/kg) | -     | -    | 0.0003 | ** |    |
|                                 |                  |     |                                  |                                      | Saline vs. FENM (1 mg/kg)       | -     | -    | 0.571  | -  |    |
|                                 |                  |     |                                  |                                      | Saline vs. FENM (3 mg/kg)       | -     | -    | 0.887  | -  |    |
|                                 |                  |     | Immobility Time<br>Min 6 (sec)   | Dunnett's<br>multiple<br>comparisons | Saline vs. FENM (10 mg/kg)      | -     | -    | 0.0246 | *  |    |
|                                 |                  |     |                                  |                                      | Saline vs. Memantine (1 mg/kg)  | -     | -    | 0.0274 | *  |    |
|                                 |                  |     |                                  |                                      | Saline vs. Memantine (3 mg/kg)  | -     | -    | 0.0146 | *  |    |
|                                 |                  |     |                                  |                                      | Saline vs. Memantine (10 mg/kg) | -     | -    | 0.0005 | ** |    |
|                                 |                  |     |                                  |                                      | Saline vs. FENM (1 mg/kg)       | -     | -    | 0.3838 | -  |    |
|                                 |                  |     |                                  |                                      | Saline vs. FENM (3 mg/kg)       | -     | -    | 0.49   | -  |    |
|                                 |                  |     | Immobility Time<br>Min 3-6 (sec) | ANOVA                                | Drug                            | 4.558 | 6,77 | 0.0005 | ** |    |
|                                 |                  |     |                                  | Dunnett's<br>multiple<br>comparisons | Saline vs. FENM (10 mg/kg)      | -     | -    | 0.0244 | *  |    |
|                                 |                  |     |                                  |                                      | Saline vs. Memantine (1 mg/kg)  | -     | -    | 0.0133 | *  |    |
| Saline vs. Memantine (3 mg/kg)  | -                | -   |                                  |                                      | 0.0283                          | *     |      |        |    |    |
| Saline vs. Memantine (10 mg/kg) | -                | -   |                                  |                                      | 0.0001                          | **    |      |        |    |    |
| Saline vs. FENM (1 mg/kg)       | -                | -   |                                  |                                      | 0.3384                          | -     |      |        |    |    |
| Saline vs. FENM (3 mg/kg)       | -                | -   | 0.6842                           | -                                    |                                 |       |      |        |    |    |

|  |                                 |                  |                     |             |                                |                                 |             |         |         |                |         |     |
|--|---------------------------------|------------------|---------------------|-------------|--------------------------------|---------------------------------|-------------|---------|---------|----------------|---------|-----|
|  |                                 |                  |                     |             | Saline vs. FENM (10 mg/kg)     | -                               | -           | 0.0125  | *       |                |         |     |
|  |                                 |                  | Bursting Time (sec) | RMANOVA     | Drug                           | 10.78                           | 6,462       | <0.0001 | ***     | data not shown |         |     |
|  |                                 |                  |                     |             |                                | Time                            | 96.45       | 5,462   | <0.0001 |                | ***     |     |
|  |                                 |                  |                     |             |                                | Drug x Time                     | 0.525       | 30,462  | 0.9831  |                | -       |     |
|  |                                 |                  |                     |             | Dunnett's multiple comparisons | Saline vs. Memantine (1 mg/kg)  | -           | -       | <0.0001 |                | ***     |     |
|  |                                 |                  |                     |             |                                | Saline vs. Memantine (3 mg/kg)  | -           | -       | 0.0493  |                | *       |     |
|  |                                 |                  |                     |             |                                | Saline vs. Memantine (10 mg/kg) | -           | -       | <0.0001 |                | ***     |     |
|  |                                 |                  |                     |             |                                | Saline vs. FENM (1 mg/kg)       | -           | -       | 0.2605  |                | -       |     |
|  |                                 |                  |                     |             | Saline vs. FENM (3 mg/kg)      | -                               | -           | 0.0252  | *       |                |         |     |
|  |                                 |                  |                     |             | Saline vs. FENM (10 mg/kg)     | -                               | -           | <0.0001 | ***     |                |         |     |
|  |                                 |                  | Bursting Time (sec) | ANOVA       | Drug                           | 4.434                           | 6,77        | 0.0007  | **      | data not shown |         |     |
|  |                                 |                  |                     |             | Dunnett's multiple comparisons | Saline vs. Memantine (1 mg/kg)  | -           | -       | 0.0365  |                | *       |     |
|  |                                 |                  |                     |             |                                | Saline vs. Memantine (3 mg/kg)  | -           | -       | 0.1649  |                | -       |     |
|  |                                 |                  |                     |             |                                | Saline vs. Memantine (10 mg/kg) | -           | -       | 0.0002  |                | **      |     |
|  |                                 |                  |                     |             |                                | Saline vs. FENM (1 mg/kg)       | -           | -       | 0.6779  |                | -       |     |
|  |                                 |                  |                     |             |                                | Saline vs. FENM (3 mg/kg)       | -           | -       | 0.3614  |                | -       |     |
|  |                                 |                  |                     |             |                                | Saline vs. FENM (10 mg/kg)      | -           | -       | 0.0026  |                | **      |     |
|  |                                 |                  |                     |             |                                |                                 |             |         |         |                |         |     |
|  | Cued Fear Conditioning Training | Cued FC Training | Freezing (%)        | RMANOVA     | Drug                           | 1.219                           | 3,28        | 0.3212  | -       | 4B             |         |     |
|  |                                 |                  |                     |             |                                |                                 | Time        | 178.2   | 3,84    |                | <0.0001 | *** |
|  |                                 |                  |                     |             |                                |                                 | Drug x Time | 1.574   | 9,84    |                | 0.1364  | -   |
|  |                                 |                  | Freezing (%)        | 2-way ANOVA | Drug                           | 1.562                           | 3,112       | 0.2027  | -       | 4C             |         |     |
|  |                                 |                  |                     |             |                                | Tone                            | 161.5       | 3,112   | <0.0001 |                | ***     |     |
|  |                                 |                  |                     |             |                                | Drug x Tone                     | 1.426       | 9,112   | 0.1852  |                | -       |     |
|  |                                 |                  | Freezing (%)        | RMANOVA     | Drug                           | 27.31                           | 3,28        | <0.0001 | ***     | 4D             |         |     |
|  |                                 |                  |                     |             |                                | Time                            | 11.6        | 24,672  | <0.0001 |                | ***     |     |
|  |                                 |                  |                     |             |                                | Drug x Time                     | 6.451       | 72,672  | <0.0001 |                | ***     |     |
|  |                                 |                  |                     |             | Dunnett's multiple comparisons | Saline vs. FENM (5 mg/kg)       | -           | -       | 0.0001  |                | **      |     |
|  |                                 |                  |                     |             |                                | Saline vs. FENM (10 mg/kg)      | -           | -       | <0.0001 |                | ***     |     |
|  |                                 |                  |                     |             | Saline vs. FENM (20 mg/kg)     | -                               | -           | 0.6682  | -       |                |         |     |
|  |                                 |                  |                     | 2-way       | Drug                           | 11.62                           | 3,112       | <0.0001 | ***     |                |         |     |

|                                                           |                                   |                            |              |                                |                                      |       |       |         |     |    |
|-----------------------------------------------------------|-----------------------------------|----------------------------|--------------|--------------------------------|--------------------------------------|-------|-------|---------|-----|----|
| Extinction,<br>injection 30<br>minutes<br>before training | Tone Test 1                       | Test 1                     | Freezing (%) | 2-way ANOVA                    | Tone                                 | 21.87 | 3,112 | <0.0001 | *** | 4E |
|                                                           |                                   |                            |              |                                | Drug x Tone                          | 9.659 | 9,112 | <0.0001 | *** |    |
|                                                           |                                   |                            |              | Dunnett's multiple comparisons | Saline vs. FENM (5 mg/kg)            | -     | -     | 0.0178  | *   |    |
|                                                           |                                   |                            |              |                                | Saline vs. FENM (10 mg/kg)           | -     | -     | <0.0001 | *** |    |
|                                                           |                                   |                            |              |                                | Saline vs. FENM (20 mg/kg)           | -     | -     | 0.904   | -   |    |
|                                                           |                                   |                            |              | Dunnett's multiple comparisons | Pre-tone: Saline vs. FENM (5 mg/kg)  | -     | -     | 0.8358  | -   |    |
|                                                           |                                   |                            |              |                                | Pre-tone: Saline vs. FENM (10 mg/kg) | -     | -     | 0.8147  | -   |    |
|                                                           |                                   |                            |              |                                | Pre-tone: Saline vs. FENM (20 mg/kg) | -     | -     | 0.9994  | -   |    |
|                                                           |                                   |                            |              | Dunnett's multiple comparisons | 1-8: Saline vs. FENM (5 mg/kg)       | -     | -     | 0.9943  | -   |    |
|                                                           |                                   |                            |              |                                | 1-8: Saline vs. FENM (10 mg/kg)      | -     | -     | 0.1397  | -   |    |
|                                                           |                                   |                            |              |                                | 1-8: Saline vs. FENM (20 mg/kg)      | -     | -     | 0.0002  | **  |    |
|                                                           |                                   |                            |              | Dunnett's multiple comparisons | 9-16: Saline vs. FENM (5 mg/kg)      | -     | -     | 0.0001  | **  |    |
|                                                           |                                   |                            |              |                                | 9-16: Saline vs. FENM (10 mg/kg)     | -     | -     | <0.0001 | *** |    |
|                                                           |                                   |                            |              |                                | 9-16: Saline vs. FENM (20 mg/kg)     | -     | -     | 0.9698  | -   |    |
|                                                           |                                   |                            |              | Dunnett's multiple comparisons | 17-24: Saline vs. FENM (5 mg/kg)     | -     | -     | 0.1829  | -   |    |
|                                                           | 17-24: Saline vs. FENM (10 mg/kg) | -                          | -            |                                | 0.6512                               | -     |       |         |     |    |
|                                                           | 17-24: Saline vs. FENM (20 mg/kg) | -                          | -            |                                | 0.003                                | **    |       |         |     |    |
|                                                           | RMANOVA                           | Drug                       | 46.46        | 3,28                           | <0.0001                              | ***   | 4F    |         |     |    |
|                                                           |                                   | Time                       | 15.35        | 24,672                         | <0.0001                              | ***   |       |         |     |    |
|                                                           |                                   | Drug x Time                | 4.664        | 72,672                         | <0.0001                              | ***   |       |         |     |    |
|                                                           |                                   | Saline vs. FENM (5 mg/kg)  | -            | -                              | 0.9857                               | -     |       |         |     |    |
|                                                           | Dunnett's multiple comparisons    | Saline vs. FENM (10 mg/kg) | -            | -                              | <0.0001                              | ***   |       |         |     |    |
|                                                           |                                   | Saline vs. FENM (20 mg/kg) | -            | -                              | <0.0001                              | ***   |       |         |     |    |
|                                                           |                                   | Drug                       | 66.81        | 3,112                          | <0.0001                              | ***   |       |         |     |    |
|                                                           | Tone                              | 41.62                      | 3,112        | <0.0001                        | ***                                  |       |       |         |     |    |
|                                                           | Drug x Tone                       | 4.666                      | 9,112        | <0.0001                        | ***                                  |       |       |         |     |    |

|             |        |              |                                |                                      |   |   |         |     |    |
|-------------|--------|--------------|--------------------------------|--------------------------------------|---|---|---------|-----|----|
| Tone Test 2 | Test 2 | Freezing (%) | Dunnett's multiple comparisons | Saline vs. FENM (5 mg/kg)            | - | - | 0.7523  | -   | 4G |
|             |        |              |                                | Saline vs. FENM (10 mg/kg)           | - | - | <0.0001 | *** |    |
|             |        |              |                                | Saline vs. FENM (20 mg/kg)           | - | - | <0.0001 | *** |    |
|             |        |              | Dunnett's multiple comparisons | Pre-tone: Saline vs. FENM (5 mg/kg)  | - | - | 0.4213  | -   |    |
|             |        |              |                                | Pre-tone: Saline vs. FENM (10 mg/kg) | - | - | <0.0001 | *** |    |
|             |        |              |                                | Pre-tone: Saline vs. FENM (20 mg/kg) | - | - | <0.0001 | *** |    |
|             |        |              | Dunnett's multiple comparisons | 1-8: Saline vs. FENM (5 mg/kg)       | - | - | 0.0001  | **  |    |
|             |        |              |                                | 1-8: Saline vs. FENM (10 mg/kg)      | - | - | 0.0112  | *   |    |
|             |        |              |                                | 1-8: Saline vs. FENM (20 mg/kg)      | - | - | 0.0088  | **  |    |
|             |        |              | Dunnett's multiple comparisons | 9-16: Saline vs. FENM (5 mg/kg)      | - | - | 0.0088  | **  |    |
|             |        |              |                                | 9-16: Saline vs. FENM (10 mg/kg)     | - | - | <0.0001 | *** |    |
|             |        |              |                                | 9-16: Saline vs. FENM (20 mg/kg)     | - | - | <0.0001 | *** |    |
|             |        |              | Dunnett's multiple comparisons | 17-24: Saline vs. FENM (5 mg/kg)     | - | - | 0.2472  | -   |    |
|             |        |              |                                | 17-24: Saline vs. FENM (10 mg/kg)    | - | - | 0.0025  | **  |    |
|             |        |              |                                | 17-24: Saline vs. FENM (20 mg/kg)    | - | - | <0.0001 | *** |    |

|                                 |                            |              |             |             |       |        |         |     |                |
|---------------------------------|----------------------------|--------------|-------------|-------------|-------|--------|---------|-----|----------------|
| Cued Fear Conditioning Training | Cued FC Training           | Freezing (%) | RMANOVA     | Drug        | 1.423 | 3,27   | 0.2577  | -   | data not shown |
|                                 |                            |              |             | Time        | 177.9 | 3,81   | <0.0001 | *** |                |
|                                 |                            |              |             | Drug x Time | 1.288 | 9,81   | 0.2563  | -   |                |
|                                 |                            | Freezing (%) | 2-way ANOVA | Drug        | 1.656 | 3,108  | 0.1808  | -   |                |
|                                 |                            |              |             | Tone        | 168.2 | 3,108  | <0.0001 | *** |                |
|                                 |                            |              |             | Drug x Tone | 1.218 | 9,108  | 0.2917  | -   |                |
|                                 |                            | Freezing (%) | RMANOVA     | Drug        | 6.298 | 3,27   | 0.0022  | **  |                |
|                                 |                            |              |             | Time        | 6.808 | 24,648 | <0.0001 | *** |                |
|                                 |                            |              |             | Drug x Time | 4.643 | 72,648 | <0.0001 | *** |                |
| Dunnett's multiple              | Saline vs. FENM (5 mg/kg)  |              |             | -           | -     | 0.0424 | *       |     |                |
|                                 | Saline vs. FENM (10 mg/kg) |              |             | -           | -     | 0.3284 | -       |     |                |

|                                                         |                                  |                                   |                            |                                |                                      |         |       |         |     |    |
|---------------------------------------------------------|----------------------------------|-----------------------------------|----------------------------|--------------------------------|--------------------------------------|---------|-------|---------|-----|----|
| Extinction,<br>injection 30<br>minutes<br>before Test 1 | Tone Test 1                      | Test 1                            | Freezing (%)               | comparisons                    | Saline vs. FENM (20 mg/kg)           | -       | -     | 0.4934  | -   | 5C |
|                                                         |                                  |                                   |                            | 2-way ANOVA                    | Drug                                 | 4.723   | 3,108 | 0.0039  | **  |    |
|                                                         |                                  |                                   |                            |                                | Tone                                 | 9.777   | 3,108 | <0.0001 | *** |    |
|                                                         |                                  |                                   |                            |                                | Drug x Tone                          | 6.892   | 9,108 | <0.0001 | *** |    |
|                                                         |                                  |                                   |                            | Dunnett's multiple comparisons | Saline vs. FENM (5 mg/kg)            | -       | -     | 0.0376  | *   |    |
|                                                         |                                  |                                   |                            |                                | Saline vs. FENM (10 mg/kg)           | -       | -     | 0.7276  | -   |    |
|                                                         |                                  |                                   |                            |                                | Saline vs. FENM (20 mg/kg)           | -       | -     | 0.3011  | -   |    |
|                                                         |                                  |                                   |                            | Dunnett's multiple comparisons | Pre-tone: Saline vs. FENM (5 mg/kg)  | -       | -     | 0.976   | -   |    |
|                                                         |                                  |                                   |                            |                                | Pre-tone: Saline vs. FENM (10 mg/kg) | -       | -     | 0.2743  | -   |    |
|                                                         |                                  |                                   |                            |                                | Pre-tone: Saline vs. FENM (20 mg/kg) | -       | -     | 0.8568  | -   |    |
|                                                         |                                  |                                   |                            | Dunnett's multiple comparisons | 1-8: Saline vs. FENM (5 mg/kg)       | -       | -     | 0.9369  | -   |    |
|                                                         |                                  |                                   |                            |                                | 1-8: Saline vs. FENM (10 mg/kg)      | -       | -     | 0.3193  | -   |    |
|                                                         |                                  |                                   |                            |                                | 1-8: Saline vs. FENM (20 mg/kg)      | -       | -     | 0.9987  | -   |    |
|                                                         |                                  |                                   |                            | Dunnett's multiple comparisons | 9-16: Saline vs. FENM (5 mg/kg)      | -       | -     | <0.0001 | *** |    |
|                                                         |                                  |                                   |                            |                                | 9-16: Saline vs. FENM (10 mg/kg)     | -       | -     | 0.8027  | -   |    |
|                                                         | 9-16: Saline vs. FENM (20 mg/kg) | -                                 | -                          |                                | 0.0013                               | **      |       |         |     |    |
|                                                         | Dunnett's multiple comparisons   | 17-24: Saline vs. FENM (5 mg/kg)  | -                          | -                              | 0.9111                               | -       |       |         |     |    |
|                                                         |                                  | 17-24: Saline vs. FENM (10 mg/kg) | -                          | -                              | 0.5848                               | -       |       |         |     |    |
|                                                         |                                  | 17-24: Saline vs. FENM (20 mg/kg) | -                          | -                              | 0.5315                               | *       |       |         |     |    |
|                                                         | Freezing (%)                     | RMANOVA                           | Drug                       | 6.802                          | 3,27                                 | 0.0015  | **    | 5D      |     |    |
|                                                         |                                  |                                   | Time                       | 18.81                          | 24,648                               | <0.0001 | ***   |         |     |    |
|                                                         |                                  |                                   | Drug x Time                | 2.906                          | 72,648                               | <0.0001 | ***   |         |     |    |
|                                                         |                                  | Dunnett's multiple comparisons    | Saline vs. FENM (5 mg/kg)  | -                              | -                                    | 0.189   | -     |         |     |    |
|                                                         |                                  |                                   | Saline vs. FENM (10 mg/kg) | -                              | -                                    | 0.654   | -     |         |     |    |
|                                                         |                                  |                                   | Saline vs. FENM (20 mg/kg) | -                              | -                                    | 0.0007  | **    |         |     |    |



|              |             |              |                                 |                                      |              |         |         |       |    |      |         |     |                |
|--------------|-------------|--------------|---------------------------------|--------------------------------------|--------------|---------|---------|-------|----|------|---------|-----|----------------|
| Tone Test 2  | Test 2      | Freezing (%) | 2-way ANOVA                     | Drug                                 | 8.452        | 3,108   | <0.0001 | ***   | 5E |      |         |     |                |
|              |             |              |                                 | Tone                                 | 78.04        | 3,108   | <0.0001 | ***   |    |      |         |     |                |
|              |             |              |                                 | Drug x Tone                          | 3.822        | 9,108   | 0.0003  | **    |    |      |         |     |                |
|              |             |              | Dunnett's multiple comparisons  | Saline vs. FENM (5 mg/kg)            | -            | -       | 0.1318  | -     |    |      |         |     |                |
|              |             |              |                                 | Saline vs. FENM (10 mg/kg)           | -            | -       | 0.5836  | -     |    |      |         |     |                |
|              |             |              |                                 | Saline vs. FENM (20 mg/kg)           | -            | -       | <0.0001 | ***   |    |      |         |     |                |
|              |             |              | Dunnett's multiple comparisons  | Pre-tone: Saline vs. FENM (5 mg/kg)  | -            | -       | 0.7568  | -     |    |      |         |     |                |
|              |             |              |                                 | Pre-tone: Saline vs. FENM (10 mg/kg) | -            | -       | 0.9323  | -     |    |      |         |     |                |
|              |             |              |                                 | Pre-tone: Saline vs. FENM (20 mg/kg) | -            | -       | 0.0692  | -     |    |      |         |     |                |
|              |             |              | Dunnett's multiple comparisons  | 1-8: Saline vs. FENM (5 mg/kg)       | -            | -       | 0.8296  | -     |    |      |         |     |                |
|              |             |              |                                 | 1-8: Saline vs. FENM (10 mg/kg)      | -            | -       | 0.7153  | -     |    |      |         |     |                |
|              |             |              |                                 | 1-8: Saline vs. FENM (20 mg/kg)      | -            | -       | 0.2587  | -     |    |      |         |     |                |
|              |             |              | Dunnett's multiple comparisons  | 9-16: Saline vs. FENM (5 mg/kg)      | -            | -       | 0.0008  | **    |    |      |         |     |                |
|              |             |              |                                 | 9-16: Saline vs. FENM (10 mg/kg)     | -            | -       | 0.0066  | **    |    |      |         |     |                |
|              |             |              |                                 | 9-16: Saline vs. FENM (20 mg/kg)     | -            | -       | <0.0001 | ***   |    |      |         |     |                |
|              |             |              | Dunnett's multiple comparisons  | 17-24: Saline vs. FENM (5 mg/kg)     | -            | -       | >0.9999 | -     |    |      |         |     |                |
|              |             |              |                                 | 17-24: Saline vs. FENM (10 mg/kg)    | -            | -       | 0.8581  | -     |    |      |         |     |                |
|              |             |              |                                 | 17-24: Saline vs. FENM (20 mg/kg)    | -            | -       | 0.0108  | *     |    |      |         |     |                |
|              |             |              | Cued Fear Conditioning Training | Cued FC Training                     | Freezing (%) | RMANOVA | Drug    | 2.445 |    | 3,29 | 0.084   | -   | data not shown |
|              |             |              |                                 |                                      |              |         | Time    | 378.2 |    | 3,87 | <0.0001 | *** |                |
| Drug x Time  | 1.581       | 9,87         |                                 |                                      | 0.1334       | -       |         |       |    |      |         |     |                |
| Freezing (%) | 2-way ANOVA | Drug         |                                 |                                      | 1.976        | 3,116   | 0.1214  | -     |    |      |         |     |                |
| Tone         |             | 402.4        | 3,116                           | <0.0001                              | ***          |         |         |       |    |      |         |     |                |
|              |             | Freezing (%) | RMANOVA                         | Drug x Tone                          | 1.682        | 9,116   | 0.1009  | -     |    |      |         |     |                |
|              |             |              |                                 | Drug                                 | 3.147        | 3,29    | 0.04    | *     |    |      |         |     |                |
|              |             |              |                                 | Time                                 | 17.15        | 24,696  | <0.0001 | ***   |    |      |         |     |                |
|              |             |              |                                 | Drug x Time                          | 2.42         | 72,696  | <0.0001 | ***   |    |      |         |     |                |
|              |             |              |                                 | Saline vs. FENM (5 mg/kg)            | -            | -       | 0.889   | -     |    |      |         |     |                |

|                                                         |                                      |                               |                                      |                                         |                               |         |         |         |     |                      |
|---------------------------------------------------------|--------------------------------------|-------------------------------|--------------------------------------|-----------------------------------------|-------------------------------|---------|---------|---------|-----|----------------------|
| Extinction,<br>injection 30<br>minutes<br>before Test 2 | Tone Test 1                          | Test 1                        | Freezing (%)                         | Dunnett's<br>multiple<br>comparisons    | Saline vs. FENM (10<br>mg/kg) | -       | -       | 0.35    | -   | data<br>not<br>shown |
|                                                         |                                      |                               |                                      |                                         | Saline vs. FENM (20<br>mg/kg) | -       | -       | 0.0935  | -   |                      |
|                                                         |                                      |                               |                                      | 2-way<br>ANOVA                          | Drug                          | 4.723   | 3,108   | 0.0039  | *   |                      |
|                                                         |                                      |                               | Tone                                 |                                         | 9.777                         | 3,108   | <0.0001 | ***     |     |                      |
|                                                         |                                      |                               | Drug x Tone                          |                                         | 6.892                         | 9,108   | <0.0001 | ***     |     |                      |
|                                                         |                                      |                               | Dunnett's<br>multiple<br>comparisons | Pre-tone: Saline vs. FENM<br>(5 mg/kg)  | -                             | -       | 0.976   | -       |     |                      |
|                                                         |                                      |                               |                                      | Pre-tone: Saline vs. FENM<br>(10 mg/kg) | -                             | -       | 0.2743  | -       |     |                      |
|                                                         |                                      |                               |                                      | Pre-tone: Saline vs. FENM<br>(20 mg/kg) | -                             | -       | 0.8568  | -       |     |                      |
|                                                         |                                      |                               | Dunnett's<br>multiple<br>comparisons | 1-8: Saline vs. FENM (5<br>mg/kg)       | -                             | -       | 0.9369  | -       |     |                      |
|                                                         |                                      |                               |                                      | 1-8: Saline vs. FENM (10<br>mg/kg)      | -                             | -       | 0.3193  | -       |     |                      |
|                                                         |                                      |                               |                                      | 1-8: Saline vs. FENM (20<br>mg/kg)      | -                             | -       | 0.9987  | -       |     |                      |
|                                                         |                                      |                               | Dunnett's<br>multiple<br>comparisons | 9-16: Saline vs. FENM (5<br>mg/kg)      | -                             | -       | <0.0001 | ***     |     |                      |
|                                                         |                                      |                               |                                      | 9-16: Saline vs. FENM (10<br>mg/kg)     | -                             | -       | 0.8027  | -       |     |                      |
|                                                         |                                      |                               |                                      | 9-16: Saline vs. FENM (20<br>mg/kg)     | -                             | -       | 0.0013  | **      |     |                      |
|                                                         |                                      |                               | Dunnett's<br>multiple<br>comparisons | 17-24: Saline vs. FENM (5<br>mg/kg)     | -                             | -       | 0.9111  | -       |     |                      |
|                                                         |                                      |                               |                                      | 17-24: Saline vs. FENM (10<br>mg/kg)    | -                             | -       | 0.5848  | -       |     |                      |
|                                                         |                                      |                               |                                      | 17-24: Saline vs. FENM (20<br>mg/kg)    | -                             | -       | 0.5315  | -       |     |                      |
|                                                         |                                      |                               | Freezing (%)                         | RMANOVA                                 | Drug                          | 50.01   | 3,29    | <0.0001 | *** |                      |
|                                                         | Time                                 | 14.98                         |                                      |                                         | 24,696                        | <0.0001 | ***     |         |     |                      |
|                                                         | Drug x Time                          | 2.126                         |                                      |                                         | 72,696                        | <0.0001 | ***     |         |     |                      |
|                                                         | Dunnett's<br>multiple<br>comparisons | Saline vs. FENM (5 mg/kg)     |                                      | -                                       | -                             | 0.5038  | -       |         |     |                      |
|                                                         |                                      | Saline vs. FENM (10<br>mg/kg) |                                      | -                                       | -                             | <0.0001 | ***     |         |     |                      |
|                                                         |                                      | Saline vs. FENM (20<br>mg/kg) |                                      | -                                       | -                             | <0.0001 | ***     |         |     |                      |
|                                                         | 2-way<br>ANOVA                       | Drug                          | 76.14                                | 3,116                                   | <0.0001                       | ***     |         |         |     |                      |
|                                                         |                                      | Tone                          | 39.6                                 | 3,116                                   | <0.0001                       | ***     |         |         |     |                      |
|                                                         |                                      | Drug x Tone                   | 4.368                                | 9,116                                   | <0.0001                       | ***     |         |         |     |                      |

|  |             |        |              |                                |                                      |   |   |         |     |    |
|--|-------------|--------|--------------|--------------------------------|--------------------------------------|---|---|---------|-----|----|
|  | Tone Test 2 | Test 2 | Freezing (%) | Dunnett's multiple comparisons | Saline vs. FENM (5 mg/kg)            | - | - | 0.8588  | -   | 5H |
|  |             |        |              |                                | Saline vs. FENM (10 mg/kg)           | - | - | <0.0001 | *** |    |
|  |             |        |              |                                | Saline vs. FENM (20 mg/kg)           | - | - | <0.0001 | *** |    |
|  |             |        |              | Dunnett's multiple comparisons | Pre-tone: Saline vs. FENM (5 mg/kg)  | - | - | 0.4335  | -   |    |
|  |             |        |              |                                | Pre-tone: Saline vs. FENM (10 mg/kg) | - | - | 0.0028  | **  |    |
|  |             |        |              |                                | Pre-tone: Saline vs. FENM (20 mg/kg) | - | - | <0.0001 | *** |    |
|  |             |        |              | Dunnett's multiple comparisons | 1-8: Saline vs. FENM (5 mg/kg)       | - | - | 0.2566  | -   |    |
|  |             |        |              |                                | 1-8: Saline vs. FENM (10 mg/kg)      | - | - | <0.0001 | *** |    |
|  |             |        |              |                                | 1-8: Saline vs. FENM (20 mg/kg)      | - | - | <0.0001 | *** |    |
|  |             |        |              | Dunnett's multiple comparisons | 9-16: Saline vs. FENM (5 mg/kg)      | - | - | 0.0761  | -   |    |
|  |             |        |              |                                | 9-16: Saline vs. FENM (10 mg/kg)     | - | - | <0.0001 | *** |    |
|  |             |        |              |                                | 9-16: Saline vs. FENM (20 mg/kg)     | - | - | <0.0001 | *** |    |
|  |             |        |              | Dunnett's multiple comparisons | 17-24: Saline vs. FENM (5 mg/kg)     | - | - | 0.4697  | -   |    |
|  |             |        |              |                                | 17-24: Saline vs. FENM (10 mg/kg)    | - | - | 0.0600  | -   |    |
|  |             |        |              |                                | 17-24: Saline vs. FENM (20 mg/kg)    | - | - | 0.0124  | *   |    |

|                                 |                 |     |                                       |                                |                                |       |      |        |   |      |
|---------------------------------|-----------------|-----|---------------------------------------|--------------------------------|--------------------------------|-------|------|--------|---|------|
| Baseline, light dark test       | Light Dark Test | LDT | Time in the light (sec)               | ANOVA                          | Drug                           | 2.13  | 6,76 | 0.0595 | - | S01B |
|                                 |                 |     | Inter-compartmental transitions (no.) | ANOVA                          | Drug                           | 2.314 | 6,76 | 0.0416 | * | S01C |
|                                 |                 |     |                                       | Dunnett's multiple comparisons | Saline vs. Memantine (1 mg/kg) | -     | -    | 0.5480 | - |      |
|                                 |                 |     |                                       |                                | Saline vs. Memantine (3 mg/kg) | -     | -    | 0.0533 | - |      |
| Saline vs. Memantine (10 mg/kg) | -               | -   | 0.0174                                |                                | *                              |       |      |        |   |      |

|  |  |  |  |             |                            |   |   |        |   |
|--|--|--|--|-------------|----------------------------|---|---|--------|---|
|  |  |  |  | comparisons | Saline vs. FENM (1 mg/kg)  | - | - | 0.8739 | - |
|  |  |  |  |             | Saline vs. FENM (3 mg/kg)  | - | - | 0.9781 | - |
|  |  |  |  |             | Saline vs. FENM (10 mg/kg) | - | - | 0.3863 | - |
